# Supplementary material for: Facile synthesis of nanostructured MoO3 coated Li1.2Mn0.56Ni0.16Co0.08O2 materials with good electrochemical properties
Source: Royal Society of Chemistry journal article supplement (doi:10.1039/c6ra21637d), 2016-01-01
Supplement: c6ra21637d1.pdf [file c6ra21637d1.pdf]

# Facile synthesis of nanostructured $\text{MoO}_3$ coated $\text{Li}_{1.2}\text{Mn}_{0.56}\text{Ni}_{0.16}\text{Co}_{0.08}\text{O}_2$ materials with high electrochemical properties

Yuxian Gao<sup>a\*</sup>, Pinghong Xu<sup>a</sup>, Fang Chen<sup>a</sup>, Chuxiong Ding<sup>a,b</sup>, Long Chen<sup>a</sup> and Daocong Li<sup>a</sup>

a. Department of materials, Hefei Guoxuan High-tech power Energy co.,Ltd Hefei 230011, P. R. China. Email: [gaoyx@mail.ustc.edu.cn](mailto:gaoyx@mail.ustc.edu.cn)

b. Department of Materials Science and Engineering, University of Science and Technology of China, Hefei, 230026, China

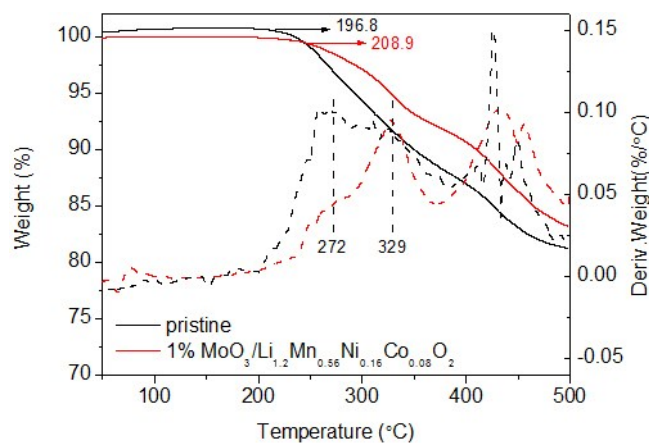

Fig.S1. TGA curves of the pristine and 1% $\text{MoO}_3/\text{Li}_{1.2}\text{Mn}_{0.56}\text{Ni}_{0.16}\text{Co}_{0.08}\text{O}_2$ .

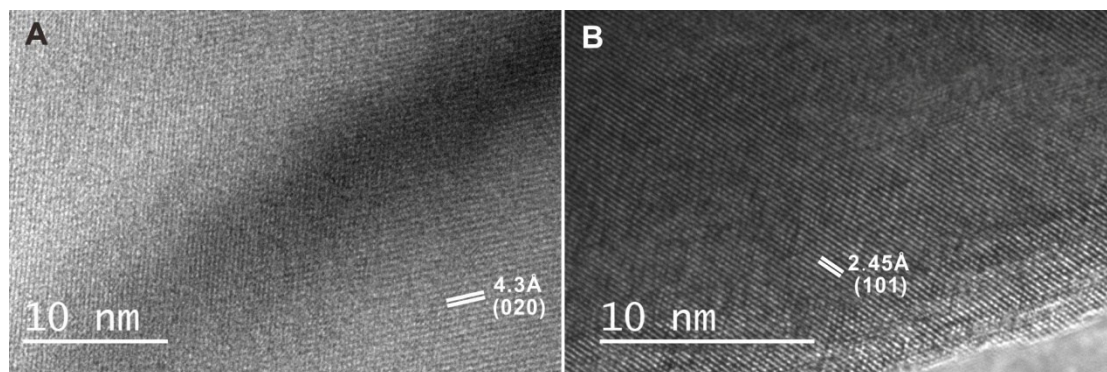

Fig.S2. (A) Corresponding TEM of Fig.6e, (B) Corresponding TEM of Fig.6f.

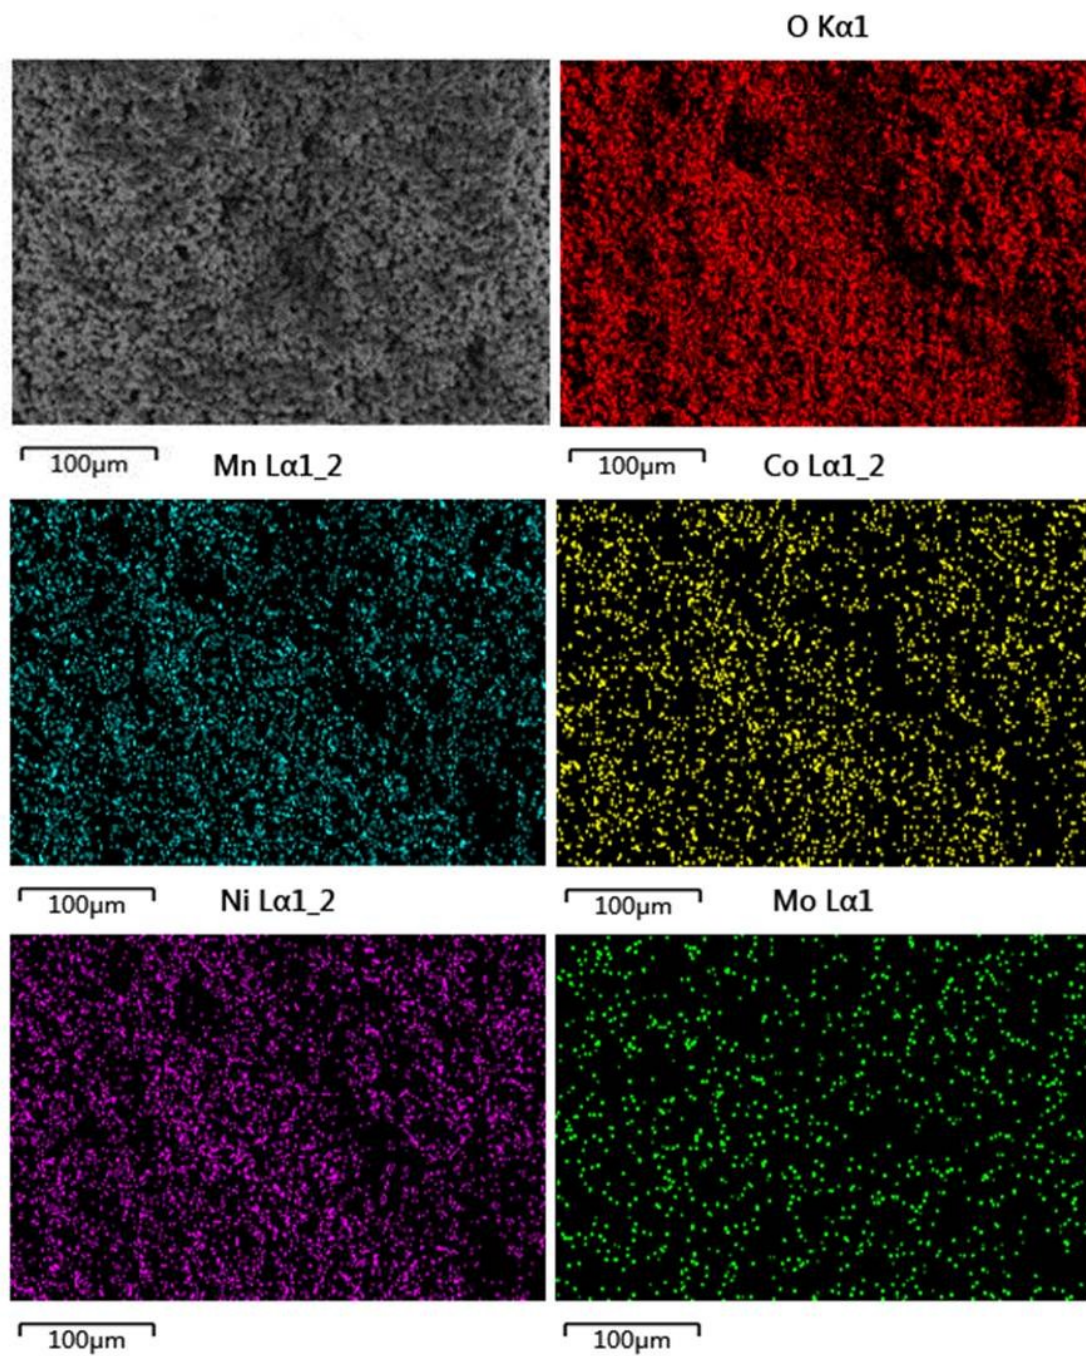

Fig. S3. SEM and the corresponding EDS mapping of 1%MoO<sub>3</sub>/Li<sub>1.2</sub>Mn<sub>0.56</sub>Ni<sub>0.16</sub>Co<sub>0.08</sub>O<sub>2</sub>.

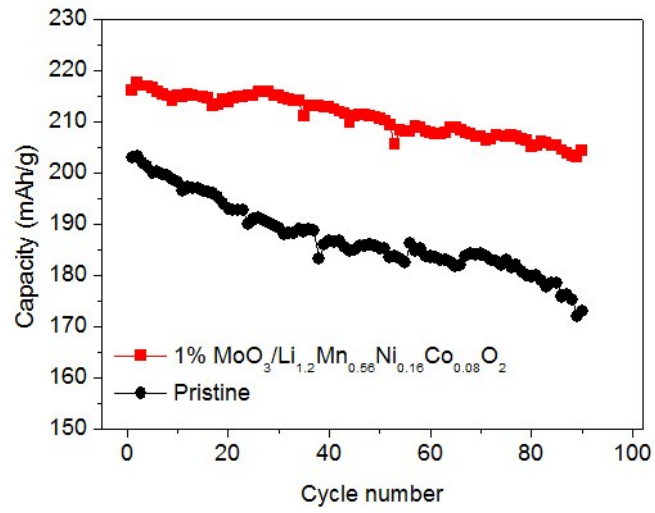

Fig. S4. Cycle performance of the pristine and 1%MoO<sub>3</sub>/Li<sub>1.2</sub>Mn<sub>0.56</sub>Ni<sub>0.16</sub>Co<sub>0.08</sub>O<sub>2</sub> retested.
